# Supplementary material
Source: MDPI journal article supplement (https://www.mdpi.com/2073-4441/13/5/729)
Supplement: s1 [file s1]

Article

# Interdecadal Variability in Myanmar Rainfall in the Monsoon Season (May–October) Using Eigen Methods

Supplementary Materials

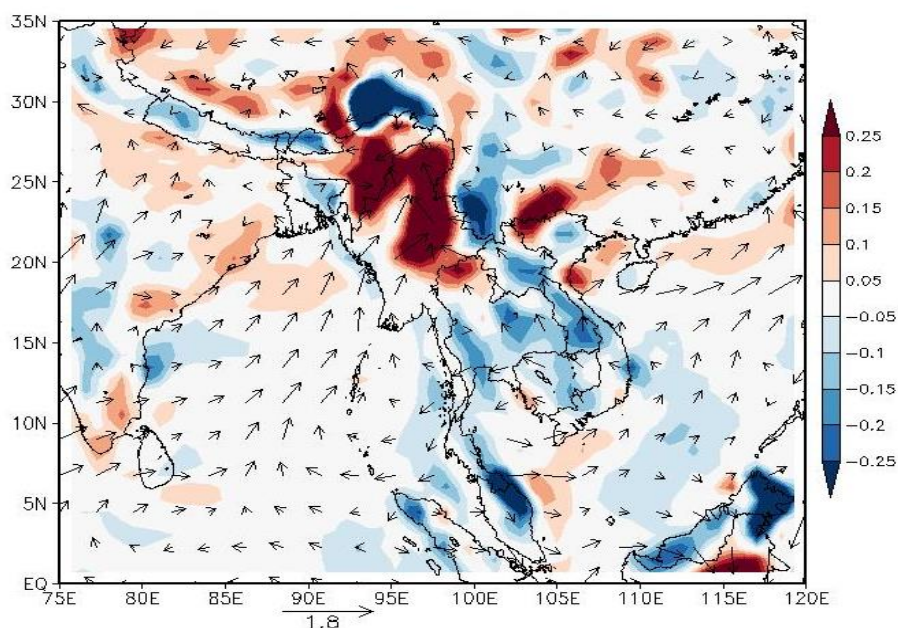

**Figure S1.** Difference fields of wet period (1962–1967, 1998, 2003–2004) minus dry period (1978–1986, 1988–1990) of moisture transport at 850 hPa ( $\text{g kg}^{-1} \text{ms}^{-1}$ ) over Myanmar computed from ERA-interim dataset. Vector shows moisture transport, while the shaded regions specify convergence (positive) and divergence (negative) moisture fluxes convergence.

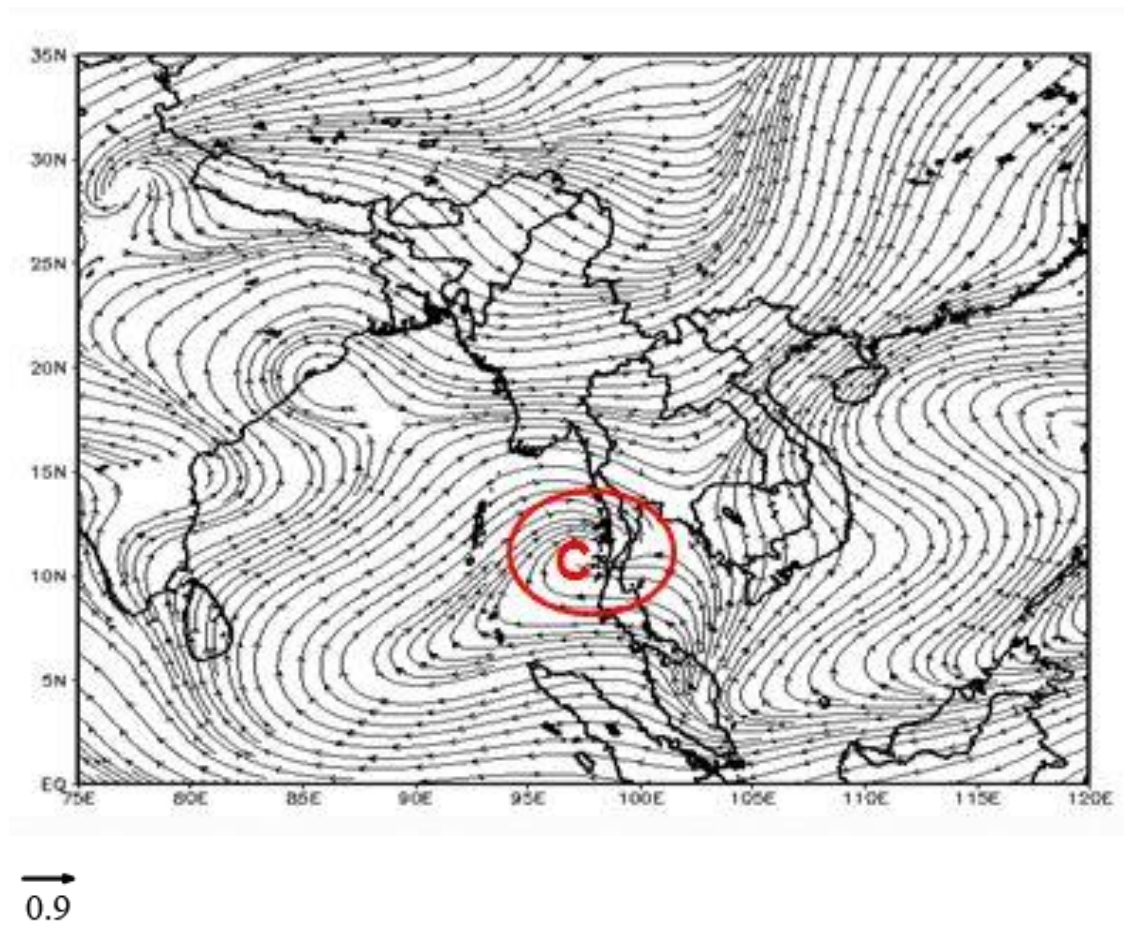

**Figure S2.** Difference stream fields of wet period (1962–1967, 1998, 2003–2004) minus dry period (1978–1986, 1988–1990) at 850 hPa in summer.
